# Supplementary material for: Head-to-head comparison of plasma p-tau217 immunoassays for incipient Alzheimer’s disease in community cohorts
Source: Research Square preprint supplement (doi:10.21203/rs.3.rs-7754328/v1), 2025-10-16
Supplement: Supplementary file 1 [file 52980e7c7bb34149c9edb407.docx]

Supplementary materials


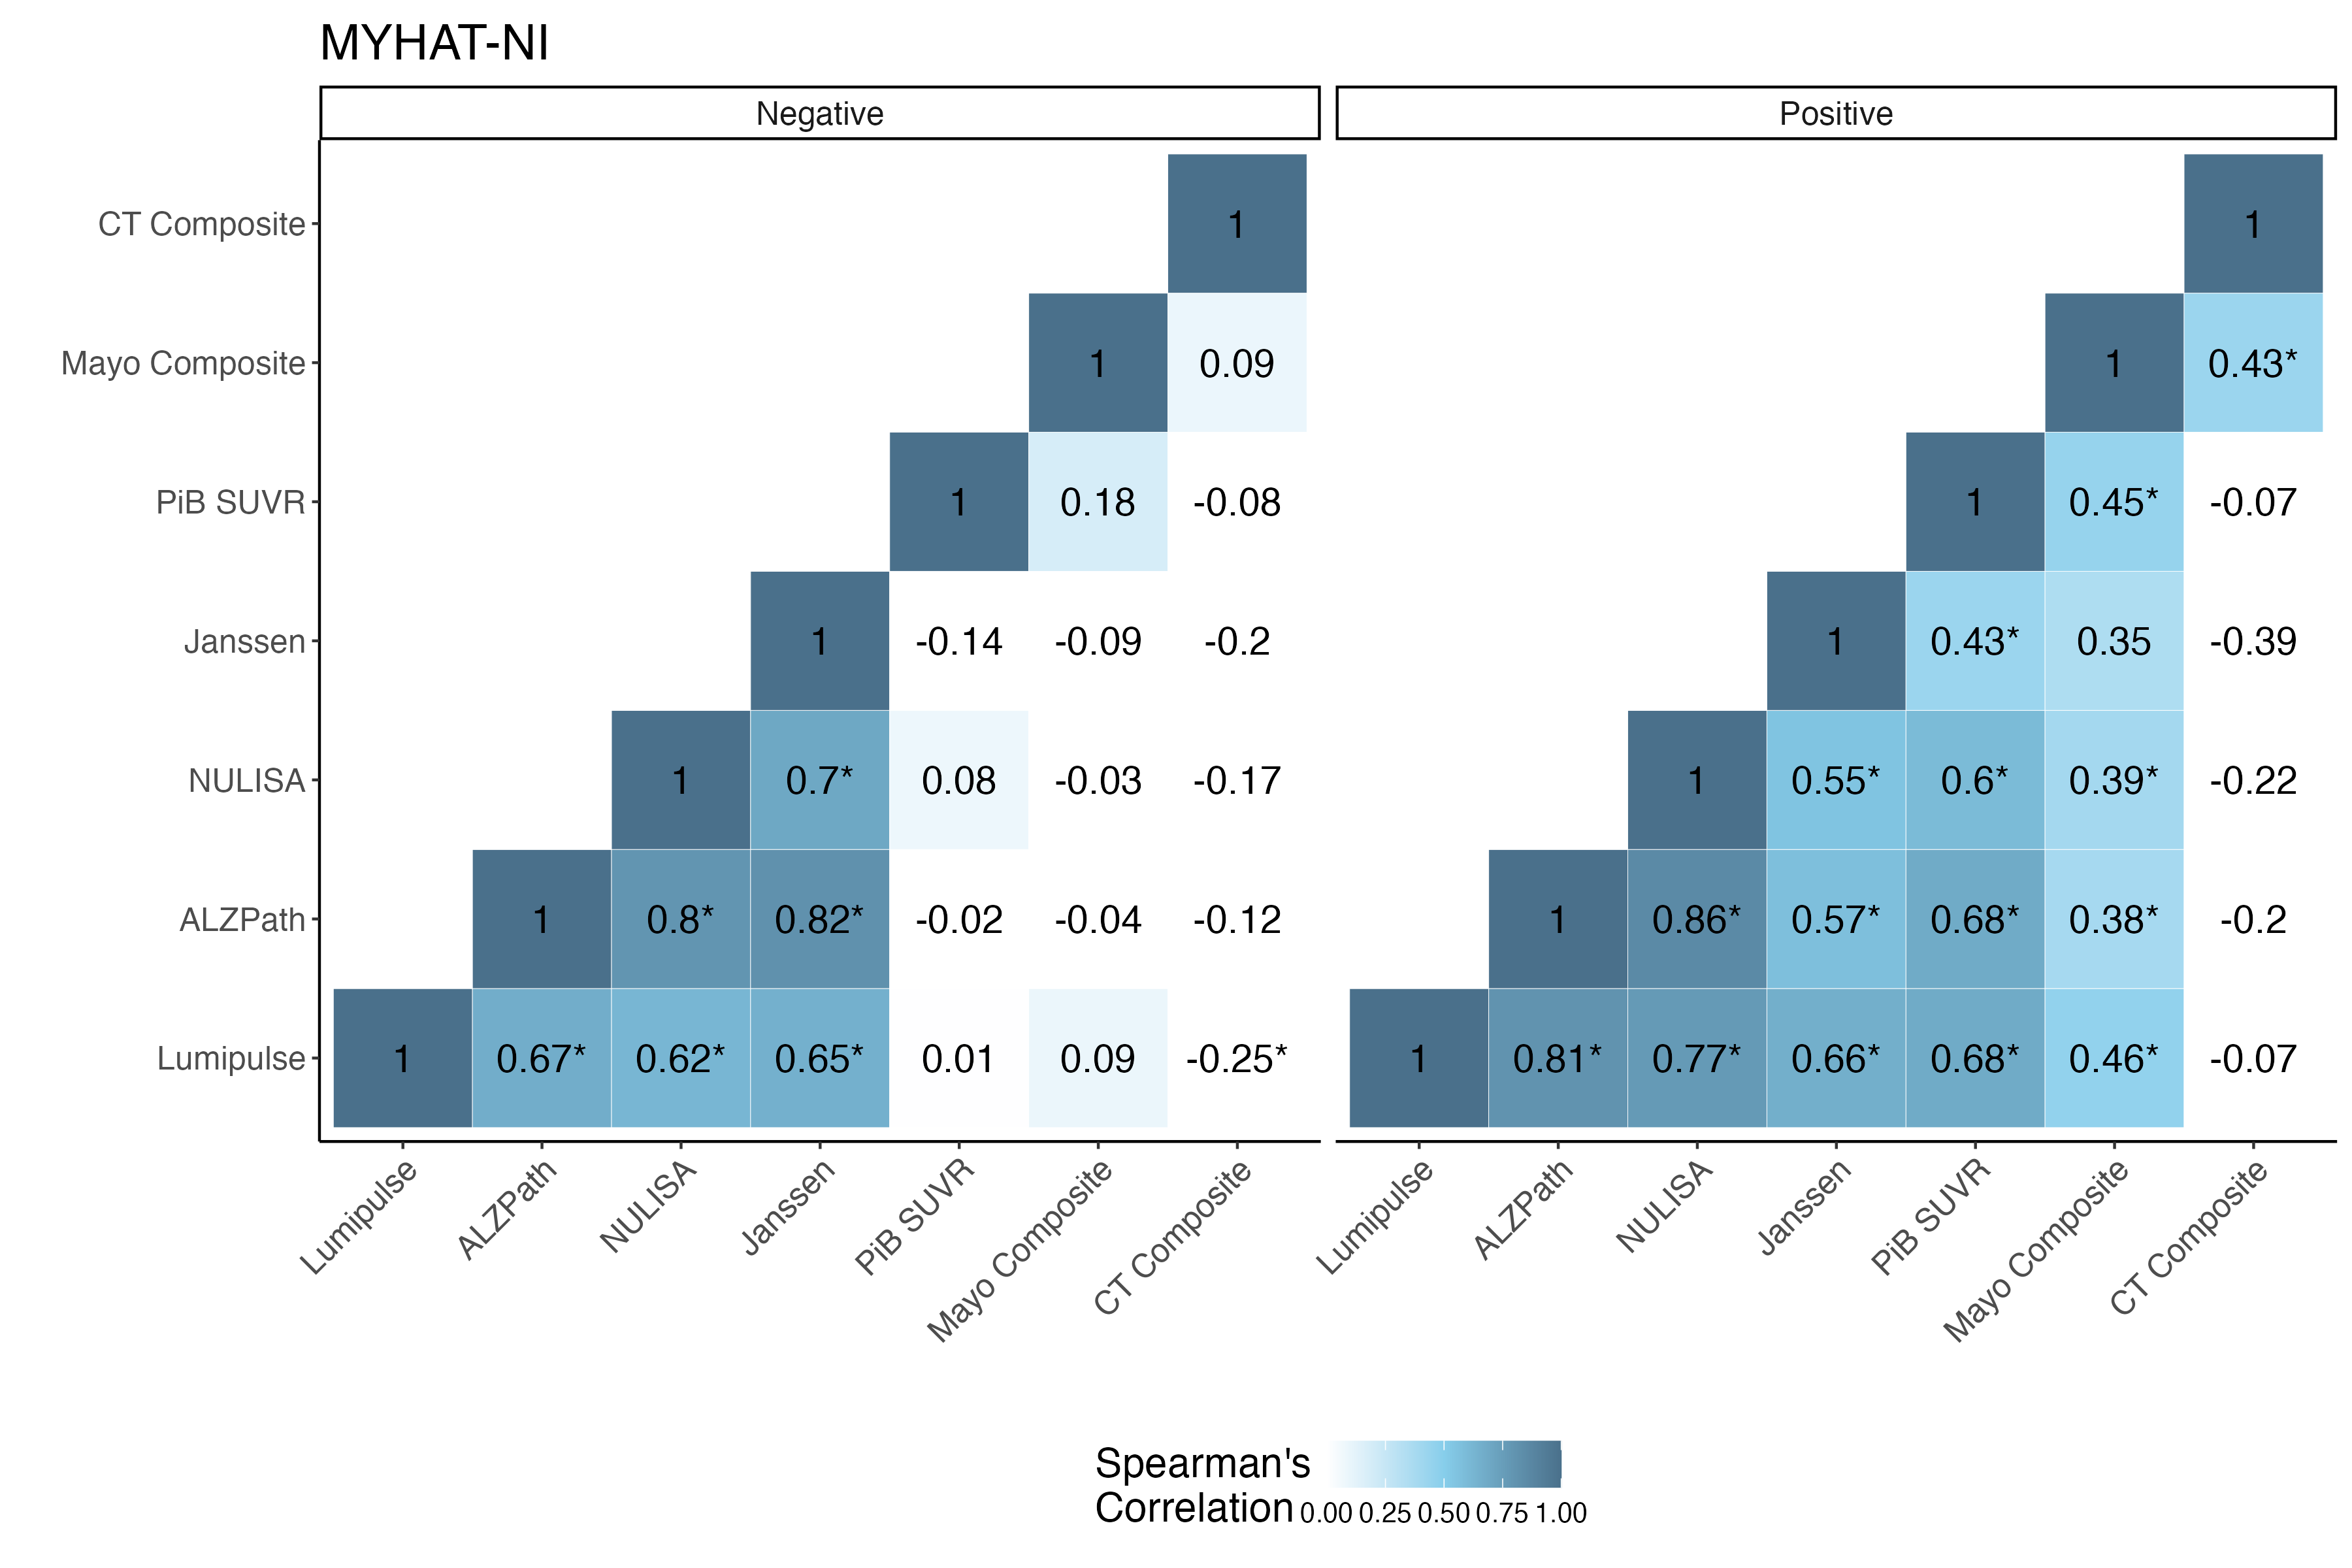


Supplementary Figure 1: Correlations between p-tau217 assays and radiotracers split by Aβ status for the MYHAT-NI cohort.


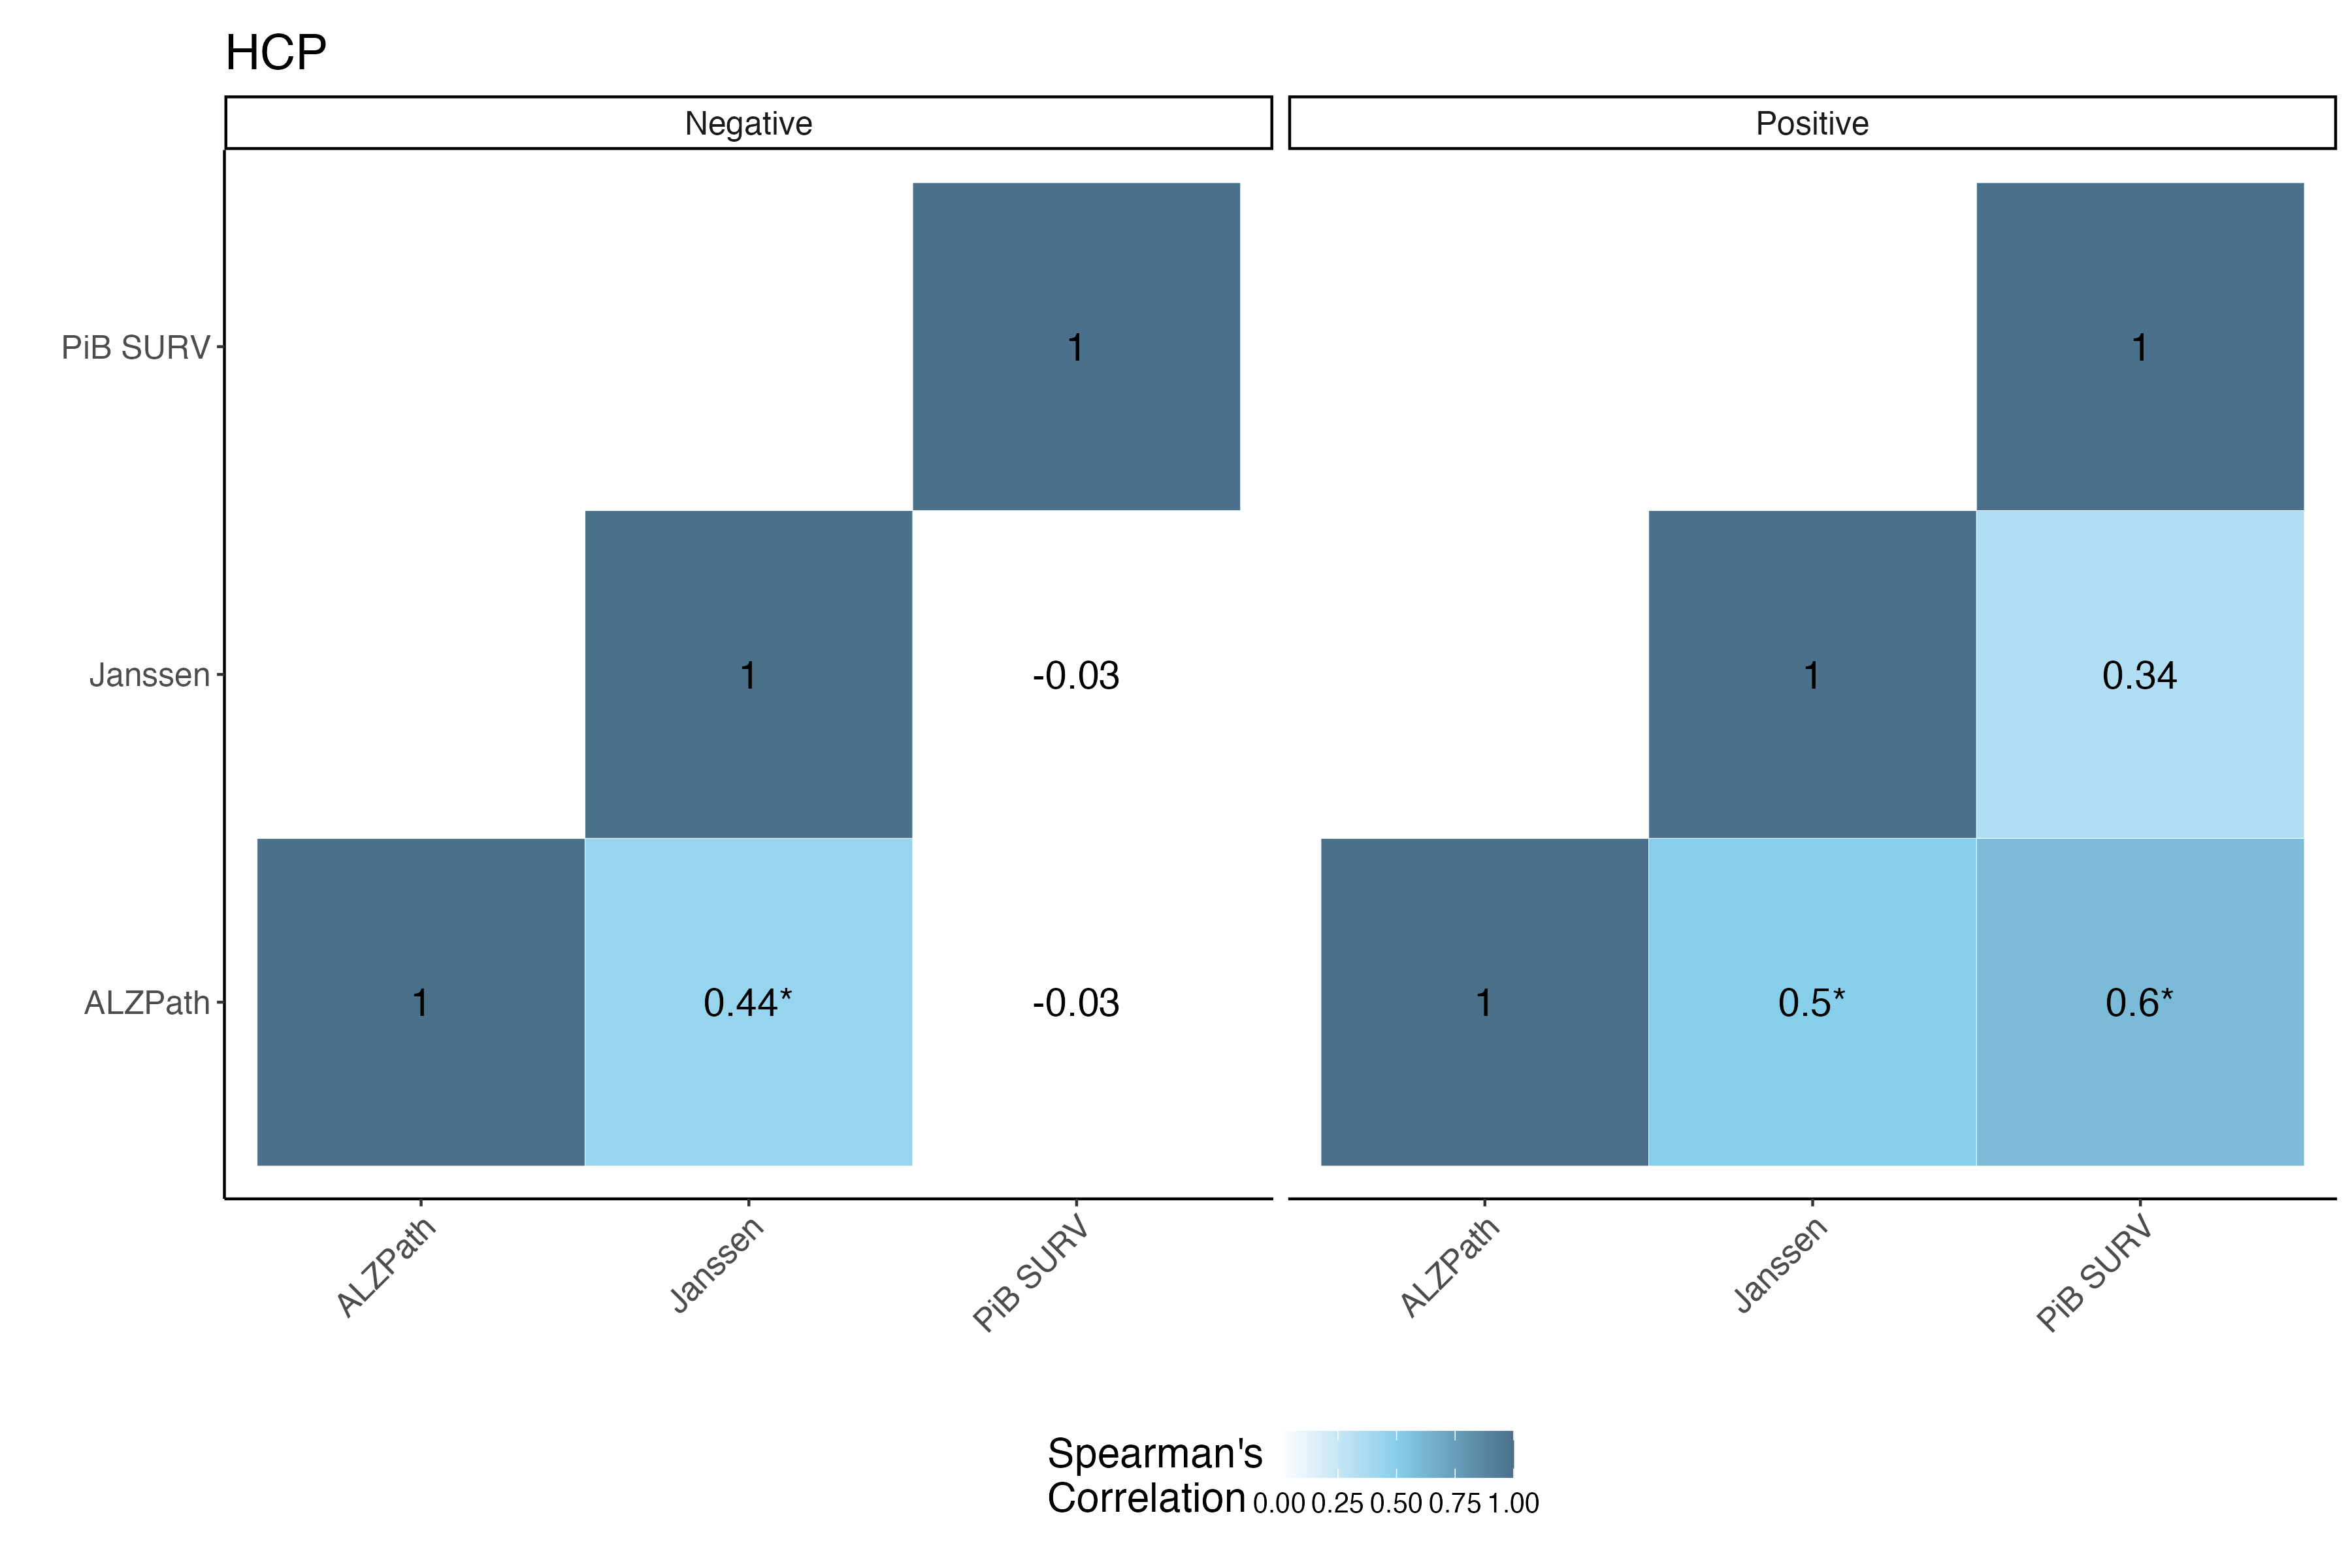


Supplementary Figure 2: Correlations between p-tau217 assays and radiotracers split by Aβ status for the HCP cohort.


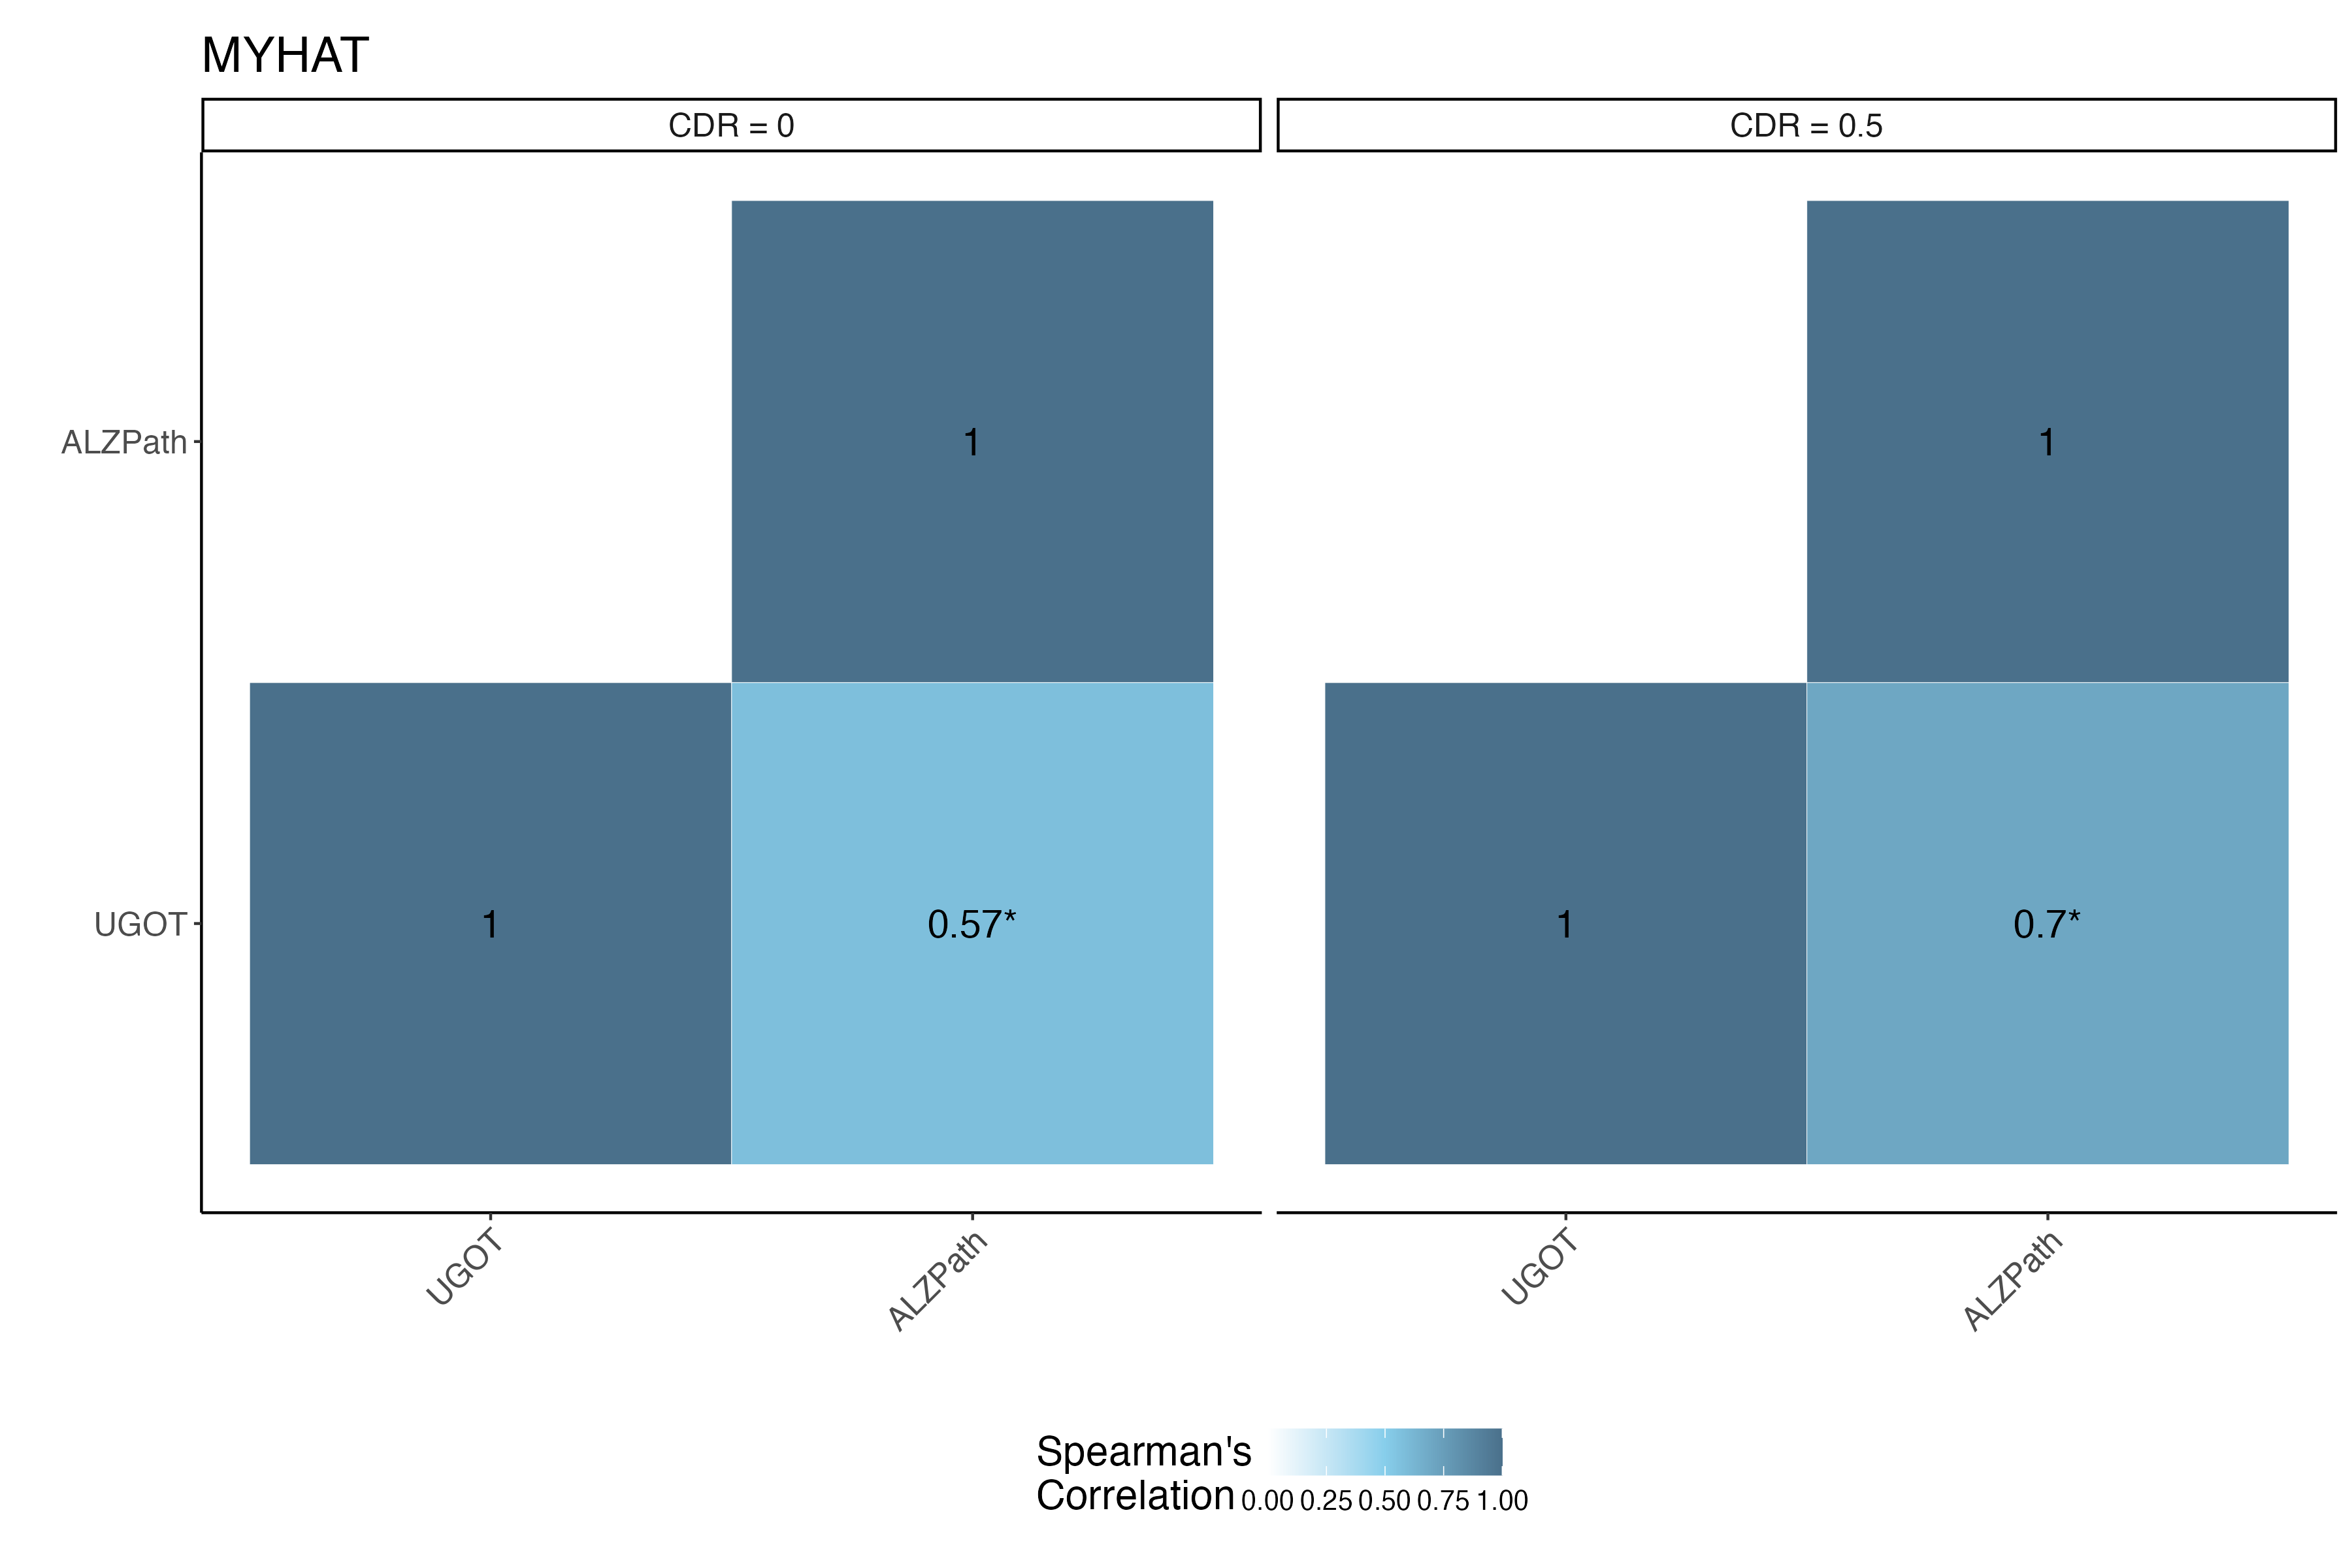


Supplementary Figure 3: Correlations between p-tau217 assays split by Aβ status for the MYHAT cohort.
